# Supplementary material for: Molecular identification and population differentiation of Aurelia spp. ephyrae in sea cucumber aquaculture ponds of northern China
Source: Springer Nature journal article supplement (doi:10.1007/s00343-020-0022-9), 2020-10-29
Supplement: 343_2020_22_MOESM1_ESM.pdf [file 343_2020_22_MOESM1_ESM.pdf]

Supplementary Table S1 Sampling sites of *A. coerulea* and other information

| Region     | Geographical Coordinate | Sample  | Abbreviation |
|------------|-------------------------|---------|--------------|
| Caofeidian | 118.506E, 39.106N       | medusae | M-CFD        |
| Laoting    | 118.686E, 39.143N       | ephyrae | E-LT         |
| Qingdao    | 120.259E, 36.202N       | medusae | M-QD         |
|            | 120.219E, 36.211N       | ephyrae | E-QD         |
| Rongcheng  | 122.410E, 36.918N       | medusae | M-RC         |
|            | 122.510E, 36.924N       | ephyrae | E-RC         |
| Weifang    | 119.182E, 37.221N       | medusae | M-WF         |
| Dongying   | 119.002E, 37.960N       | ephyrae | E-DY         |

Supplementary Table S2. Related sequences from GenBank

| Sample Code                                                                                                                      | Sample Site           | Geographical Coordinate | Haplotype No. | GenBank No. |
|----------------------------------------------------------------------------------------------------------------------------------|-----------------------|-------------------------|---------------|-------------|
| M-CFD04;<br>M-CFD06;<br>M-CFD29                                                                                                  | Caofeidian, Bohai Sea | 118.506E, 39.106N       | Hap1          | MF981165    |
| E-DY04; E-DY10;<br>E-DY17; E-DY18;<br>E-DY33; E-DY38;<br>E-DY39                                                                  | Dongying, Bohai Sea   | 119.002E, 37.960N       |               |             |
| E-LT 32; E-LT 39                                                                                                                 | Laoting, Bohai Sea    | 118.686E, 39.143N       |               |             |
| E-QD44; E-QD45;<br>E-QD48                                                                                                        | Qingdao, Yellow Sea   | 120.219E, 36.221N       |               |             |
| M-RC14; M-RC32                                                                                                                   | Rongcheng, Yellow Sea | 122.410E, 36.918N       |               |             |
| M-QD01; M-QD14;<br>M-QD15; M-QD18;<br>M-QD25                                                                                     | Qingdao, Yellow sea   | 120.322E, 36.112N       |               |             |
| M-CFD07;M-CFD08;<br>M-CFD09;M-CFD10;<br>M-CFD12;M-CFD13;<br>M-CFD18;M-CFD22;<br>M-CFD23; M-CFD27                                 | Caofeidian, Bohai Sea | 118.506E, 39.106N       |               |             |
| E-DY01; E-DY03;<br>E-DY05; E-DY07;<br>E-DY08; E-DY16;<br>E-DY34; E-DY35;<br>E-DY36                                               | Dongying, Bohai Sea   | 119.002E, 37.960N       |               |             |
| E-LT01; E-LT02;<br>E-LT03; E-LT04;<br>E-LT05; E-LT33;<br>E-LT34; E-LT35;<br>E-LT36; E-LT37;<br>E-LT39; E-LT40;<br>E-LT41; E-LT50 | Laoting, Bohai Sea    | 118.686E, 39.143N       |               |             |
| E-QD03; E-QD04;<br>E-QD05; E-QD06;<br>E-QD07; E-QD23;<br>E-QD24; E-QD26;                                                         | Qingdao, Yellow Sea   | 120.219E, 36.221N       |               |             |

|                                                                                                                                  |                       |                   |      |          |
|----------------------------------------------------------------------------------------------------------------------------------|-----------------------|-------------------|------|----------|
| E-QD41; E-QD42;<br>E-QD47; E-QD49;<br>E-QD50                                                                                     |                       |                   |      |          |
| E-RC02; E-RC05;<br>E-RC06; E-RC09;<br>E-RC17; E-RC19;<br>E-RC23; E-RC28;<br>E-RC29                                               | Rongcheng, Yellow Sea | 122.510E, 36.924N |      |          |
| M-RC01; M-RC02;<br>M-RC04; M-RC05;<br>M-RC08; M-RC12;<br>M-RC18; M-RC19;<br>M-RC20; M-RC22;<br>M-RC26; M-RC34                    | Rongcheng, Yellow Sea | 122.410E, 36.918N |      |          |
| M-QD02; M-QD03;<br>M-QD04; M-QD06;<br>M-QD07; M-QD08;<br>M-QD09; M-QD11;<br>M-QD12; M-QD13;<br>M-QD16; M-QD17;<br>M-QD20; M-QD23 | Qingdao, Yellow sea   | 120.322E, 36.112N |      |          |
| M-WF03; M-WF11;<br>M-WF13                                                                                                        | Weifang, Bohai Sea    | 119.182E, 37.221N |      |          |
| M-CFD21; M-CFD28                                                                                                                 | Caofeidian, Bohai Sea | 118.506E, 39.106N | Hap3 | MF981167 |
| E-DY02; E-DY06;<br>E-DY15                                                                                                        | Dongying, Bohai Sea   | 119.002E, 37.960N |      |          |
| E-LT14; E-LT44                                                                                                                   | Laoting, Bohai Sea    | 118.686E, 39.143N |      |          |
| E-QD08; E-QD43                                                                                                                   | Qingdao, Yellow Sea   | 120.219E, 36.221N |      |          |
| M-RC31                                                                                                                           | Rongcheng, Yellow Sea | 122.410E, 36.918N |      |          |
| M-QD05                                                                                                                           | Qingdao, Yellow sea   | 120.322E, 36.112N |      |          |
| E-RC01; E-RC14;<br>E-RC15; E-RC18;<br>E-RC25                                                                                     | Rongcheng, Yellow Sea | 122.510E, 36.924N |      |          |
| M-CFD05;<br>M-CFD19; M-CFD30                                                                                                     | Caofeidian, Bohai Sea | 118.506E, 39.106N | Hap4 | MF981168 |
| E-LT13; E-LT31;<br>E-LT45                                                                                                        | Laoting, Bohai Sea    | 118.686E, 39.143N |      |          |
| E-RC12; E-RC13;<br>E-RC16; E-RC22;<br>E-RC24                                                                                     | Rongcheng, Yellow Sea | 122.510E, 36.924N |      |          |
| M-RC03; M-RC06;<br>M-RC07; M-RC13;<br>M-RC21; M-RC25                                                                             | Rongcheng, Yellow Sea | 122.410E, 36.918N |      |          |
| M-WF01; M-WF04;<br>M-WF05; M-WF06;<br>M-WF07; M-WF08;<br>M-WF09; M-WF10;<br>M-WF12; M-WF14;<br>M-WF15                            | Weifang, Bohai Sea    | 119.182E, 37.221N |      |          |
| M-CFD20                                                                                                                          | Caofeidian, Bohai Sea | 118.506E, 39.106N | Hap5 | MF981169 |
| M-CFD26                                                                                                                          | Caofeidian, Bohai Sea | 118.506E, 39.106N | Hap6 | MF981170 |
| M-CFD25                                                                                                                          | Caofeidian, Bohai Sea | 118.506E, 39.106N | Hap7 | MF981171 |
| M-CFD16                                                                                                                          | Caofeidian, Bohai Sea | 118.506E, 39.106N | Hap8 | MF981172 |
| E-DY                                                                                                                             | Dongying, Bohai Sea   | 119.002E, 37.960N | Hap9 | MF981173 |

|        |                       |                   |       |          |
|--------|-----------------------|-------------------|-------|----------|
| E-LT42 | Laoting, Bohai Sea    | 118.686E, 39.143N | Hap10 | MF981174 |
| E-LT46 | Laoting, Bohai Sea    | 118.686E, 39.143N | Hap11 | MF981175 |
| M-QD22 | Qingdao, Yellow sea   | 120.322E, 36.112N |       |          |
| M-RC09 | Rongcheng, Yellow Sea | 122.410E, 36.918N |       |          |
| E-RC08 | Rongcheng, Yellow Sea | 122.510E, 36.924N | Hap12 | MF981176 |
| M-RC17 | Rongcheng, Yellow Sea | 122.410E, 36.918N | Hap13 | MF981177 |
| M-RC23 | Rongcheng, Yellow Sea | 122.410E, 36.918N | Hap14 | MF981178 |
| M-RC28 | Rongcheng, Yellow Sea | 122.410E, 36.918N | Hap15 | MF981179 |
| M-QD21 | Qingdao, Yellow sea   | 120.322E, 36.112N | Hap16 | MF981180 |
| M-WF02 | Weifang, Bohai Sea    | 119.182E, 37.221N | Hap17 | MF981181 |
